# Supplementary material for: Growth Velocity and Nutritional Status in Children Exposed to Zika Virus during Pregnancy from Amazonas Cohort, Brazil
Source: MDPI journal article supplement (doi:10.3390/v15030662), 2023-03-01
Supplement: s1 [file s1]

**Table Supplementary 1.** Sociodemographic and clinical characteristics, in absolute data, of pregnant women with positive RT-PCR and birth, neonatal, and postnatal clinical characteristics for Amazonas, Brazil.

| Case | Maternal characteristics |                   |                                 |                             |                                                    |                     |                        |                         | Children's characteristics |                  |                    |                 |              |                     |                      |                  |                         |                       |           |                              |
|------|--------------------------|-------------------|---------------------------------|-----------------------------|----------------------------------------------------|---------------------|------------------------|-------------------------|----------------------------|------------------|--------------------|-----------------|--------------|---------------------|----------------------|------------------|-------------------------|-----------------------|-----------|------------------------------|
|      | Age                      | Year of schooling | Number of prenatal consultation | Trimester of ZIKV infection | Tobacco or/and alcohol or/and Illicit drugs intake | Disease Gestational | Coinfection occurrence | Urinary tract infection | Gender                     | Type of delivery | Apgar at 5th min<7 | Gestational age | Pre-maturity | Birth weight (gram) | Length at birth (cm) | HC at birth (cm) | Breast feeding (months) | Neonatal complication | Dysphagia | Neurological or NPMD changed |
| 1    | 30                       | 9-11              | 13                              | 2nd                         | No                                                 | HD                  | No                     | No                      | Female                     | Cesarea          | No                 | 40.0            | No           | 3120                | 47                   | 35               | 6 mo                    | No                    | No        | Neu and NPMD                 |
| 2    | 23                       | ≥12               | 5                               | 1st                         | No                                                 | No                  | HP, B19                | No                      | Male                       | Vaginal          | -                  | 40.0            | No           | 3755                | 49                   | 37               | <6 mo                   | No                    | No        | NPMD                         |
| 3    | 27                       | ≥12               | 5                               | 3rd                         | No                                                 | No                  | No                     | No                      | Female                     | Cesarea          | No                 | 39.0            | No           | 3500                | 50                   | 35               | 6 mo                    | No                    | No        | Neu and NPMD                 |
| 5    | 30                       | ≥12               | 6                               | 2nd                         | No                                                 | HD                  | No                     | No                      | Male                       | Vaginal          | No                 | 39.0            | No           | 2810                | 48                   | 34               | 6 mo                    | No                    | No        | NPMD                         |
| 6    | 30                       | ≥12               | 6                               | 3rd                         | No                                                 | No                  | No                     | No                      | Male                       | Cesarea          | No                 | 36.0            | Yes          | 2940                | -                    | 34               | <6 mo                   | No                    | No        | NPMD                         |
| 8    | 18                       | 9-11              | 5                               | 2nd                         | No                                                 | No                  | No                     | No                      | Female                     | Vaginal          | No                 | 33.1            | Yes          | 2145                | 44                   | 31.4             | 6 mo                    | NHB, IHG and NS       | No        | Neu and NPMD                 |
| 12*  | 22                       | 1-4               | 7                               | 1st                         | No                                                 | No                  | No                     | No                      | Female                     | Vaginal          | No                 | 39.1            | No           | 2710                | 44                   | 29               | <6 mo                   | No                    | Yes       | Neu and NPMD                 |
| 19   | 40                       | ≥12               | 10                              | 1st                         | No                                                 | No                  | T                      | No                      | Male                       | Vaginal          | No                 | 39.0            | No           | 3650                | 49                   | 34               | <6 mo                   | IHG                   | No        | Neu and NPMD                 |
| 22*  | 23                       | 5-8               | 7                               | 1st                         | No                                                 | HD                  | No                     | No                      | Male                       | Cesarea          | No                 | 40.0            | No           | 3600                | 48                   | 31               | <6 mo                   | NEC                   | Yes       | Neu and NPMD                 |
| 24   | 20                       | 1-4               | 7                               | 2nd                         | No                                                 | GD                  | No                     | Yes                     | Male                       | Cesarea          | No                 | 39.0            | No           | 4256                | 51                   | 37               | <6 mo                   | No                    | No        | Neu and NPMD                 |
| 25*  | 22                       | ≥12               | 13                              | 1st                         | No                                                 | No                  | No                     | No                      | Male                       | Cesarea          | No                 | 38.0            | No           | 2516                | 44,5                 | 30               | No                      | NHB and NEC           | Yes       | Neu and NPMD                 |
| 31   | 22                       | 5-8               | 6                               | 2nd                         | No                                                 | No                  | HIV                    | Yes                     | Male                       | Cesarea          | No                 | 39.0            | No           | 3440                | 49,5                 | 36               | No                      | NHB                   | No        | Neu and NPMD                 |
| 33   | 36                       | ≥12               | 7                               | 2nd                         | No                                                 | No                  | No                     | No                      | Male                       | Cesarea          | No                 | 39.0            | No           | 3590                | 50                   | 36               | <6 mo                   | No                    | No        | Neu and NPMD                 |
| 35   | 26                       | 9-11              | 9                               | 1st                         | No                                                 | No                  | No                     | Yes                     | Male                       | Cesarea          | No                 | 40.0            | No           | 3064                | 50                   | 33               | <6 mo                   | IHG                   | Yes       | Neu and NPMD                 |

|     |    |      |    |     |     |    |     |     |        |         |     |      |     |      |      |    |       |                           |     |              |
|-----|----|------|----|-----|-----|----|-----|-----|--------|---------|-----|------|-----|------|------|----|-------|---------------------------|-----|--------------|
| 40  | 19 | 9-11 | 7  | 2nd | Yes | No | No  | No  | Female | Cesarea | No  | 39.0 | No  | 2232 | 45   | 32 | 6 mo  | No                        | No  | NPMD         |
| 42  | 38 | ≥12  | 8  | 2nd | No  | No | No  | No  | Female | Cesarea | No  | 39.0 | No  | 3600 | 48   | 34 | 6 mo  | No                        | No  | Neu and NPMD |
| 49  | 25 | 9-11 | 6  | 3rd | No  | HD | No  | No  | Male   | Cesarea | No  | 34.5 | Yes | 2110 | 41   | 32 | <6 mo | NHB and NS                | Yes | NPMD         |
| 53  | 25 | 9-11 | 5  | 2nd | No  | No | No  | No  | Female | Vaginal | Yes | 26.0 | Yes | 770  | -    | -  | 6 mo  | NHB, IHG, NS, HMD and BPD | Yes | Neu and NPMD |
| 55  | 17 | 5-8  | 9  | 3rd | No  | No | No  | No  | Male   | Vaginal | No  | 39.0 | No  | 3260 | 47   | 33 | 6 mo  | No                        | No  | Neu and NPMD |
| 57  | 32 | ≥12  | 9  | 2nd | No  | No | No  | No  | Female | Cesarea | No  | 38.0 | No  | 3100 | 46   | 36 | 6 mo  | No                        | No  | Neu and NPMD |
| 60  | 17 | 1-4  | 5  | 2nd | No  | No | HB  | No  | Male   | Vaginal | No  | 40.0 | No  | 2725 | 47   | 32 | <6 mo | No                        | No  | DNPM         |
| 65* | 23 | 9-11 | 10 | 1st | No  | No | No  | Yes | Male   | Cesarea | No  | 38.0 | No  | 2828 | 46   | 30 | 6 mo  | IHG and NEC               | Yes | Neu and NPMD |
| 67  | 36 | ≥12  | 10 | 3rd | No  | No | No  | No  | Female | Cesarea | No  | 39.0 | No  | 2895 | 48   | 33 | 6 mo  | NHB                       | No  | NPMD         |
| 68  | 28 | 9-11 | 10 | 2nd | No  | No | No  | No  | Male   | Cesarea | No  | 39.0 | No  | 3030 | 48   | 33 | <6 mo | NHB                       | No  | NPMD         |
| 71  | 27 | 9-11 | 10 | 2nd | No  | No | HIV | No  | Male   | Cesarea | No  | 38.4 | No  | 3725 | 52,5 | 37 | No    | No                        | No  | Neu and NPMD |

HC: head circumference; NPMD: neuropsychomotor development, Disease Gestational: HD: Hypertensive disease; GD: Gestational diabetes; IGR: Intrauterine growth restriction.

Coinfection occurrence: HP: Herpes simplex type 1 and 2; B19: Pavovirus B19; HIV; EB: Epstein-Barr; HB: Hepatitis B; D: Dengue; T: Toxoplasmosis; M: Malaria.

Neonatal complication: NHB: Neonatal Hyperbilirubinemia; IHG: Intracranial hemorrhage Grades 1 and 2 or Grades 3 and 4; NS: Neonatal sepsis; HMD: Hyaline Membrane Disease; BPD: Bronchopulmonary Dysplasia ; NEC: Neonatal Epleptic Crises.

\*Microcephaly children.

**Table Supplementary 2.** Evolution of anthropometric indices of a cohort of 71 children exposed to the *Zika virus* during pregnancy, during pediatric follow-up for 42 months, Amazonas, Brazil.

| Case | Gender | Z score Growth,<br>and Age | Birth | Evaluation<br>1 | Evaluation<br>2 | Evaluation<br>3 | Evaluation<br>4 | Evaluation<br>5 | Evaluation<br>6 |
|------|--------|----------------------------|-------|-----------------|-----------------|-----------------|-----------------|-----------------|-----------------|
| 1    | Female | <i>AE, in months,</i>      | -     | 6               | 8               | 10              | 12              | 24              | 26              |
|      |        | W/A-Z                      | -0,36 | -0,20           | -0,48           | -0,60           | -0,88           | 0,26            | 0,02            |
|      |        | H/A-Z                      | -1,38 | -0,53           | -0,35           | -1,31           | -0,32           | -0,46           | -0,38           |
|      |        | BMI/A-Z                    | -     | 0,13            | -0,41           | 0,21            | -0,99           | 0,73            | 0,32            |
|      |        | HC/A-Z                     | 0,22  | -0,61           | 0,20            | -0,34           | -0,07           | 0,07            | 0,03            |
| 2    | Male   | <i>AE, in months,</i>      | -     | 0               | 1               | 5               | 20              | -               | -               |
|      |        | W/A-Z                      | 0,88  | 0,97            | 1,03            | 0,42            | -0,03           | -               | -               |
|      |        | H/A-Z                      | -0,57 | 0,83            | 0,97            | 0,27            | 0,05            | -               | -               |
|      |        | BMI/A-Z                    | -     | 0,78            | 0,72            | 0,35            | -0,06           | -               | -               |
|      |        | HC/A-Z                     | 2,21  | 2,49            | 1,30            | 1,82            | 0,67            | -               | -               |
| 3    | Female | <i>AE, in months,</i>      | -     | 6               | 9               | 11              | 16              | 18              | 22              |
|      |        | W/A-Z                      | 0,90  | 0,07            | 0,54            | 0,90            | 0,46            | 0,46            | 0,81            |
|      |        | H/A-Z                      | 0,85  | -0,86           | -0,67           | -0,36           | -1,67           | -1,66           | -1,45           |
|      |        | BMI/A-Z                    | -     | 0,74            | 1,24            | 1,51            | 1,97            | 1,98            | 2,31            |
|      |        | HC/A-Z                     | 1,38  | -0,99           | 0,76            | 0,83            | 0,82            | 0,53            | 0,38            |
| 4    | Female | <i>AE, in months,</i>      | -     | 1               | 2               | 5               | -               | -               | -               |
|      |        | W/A-Z                      | -0,13 | -0,39           | 0,34            | 0,12            | -               | -               | -               |
|      |        | H/A-Z                      | -1,02 | -0,82           | 0,27            | -0,62           | -               | -               | -               |
|      |        | BMI/A-Z                    | -     | 0,05            | 0,25            | 0,62            | -               | -               | -               |
|      |        | HC/A-Z                     | -0,37 | -0,08           | 0,71            | 0,30            | -               | -               | -               |
| 5    | Male   | <i>AE, in months,</i>      | -     | 10              | 11              | 26              | 29              | -               | -               |
|      |        | W/A-Z                      | -1,06 | -1,05           | -1,20           | -1,63           | -1,39           | -               | -               |
|      |        | H/A-Z                      | -0,77 | -1,44           | -1,99           | -1,48           | -1,60           | -               | -               |

|    |        |                       |       |       |       |       |       |       |       |
|----|--------|-----------------------|-------|-------|-------|-------|-------|-------|-------|
|    |        | BMI/A-Z               | -     | -0,27 | -0,01 | -1,06 | -0,59 | -     | -     |
|    |        | HC/A-Z                | 0,08  | -1,34 | -0,83 | -1,11 | -0,98 | -     | -     |
|    |        | <i>AE, in months,</i> | -     | 2     | 4     | 6     | 9     | 10    | 20    |
|    |        | W/A-Z                 | 0,59  | 1,03  | 0,21  | -0,25 | 0,41  | 0,06  | 0,34  |
|    |        | H/A-Z                 | -     | -0,5  | -0,59 | -0,47 | -0,92 | -0,96 | -0,72 |
|    |        | BMI/A-Z               | -     | 1,9   | 0,75  | 0,03  | 1,25  | 0,83  | 1,11  |
| 6  | Male   | HC/A-Z                | 1,13  | -1,65 | -1,12 | -0,04 | 0,25  | -0,3  | 0,25  |
|    |        | <i>AE, in months,</i> | -     | 1     | 2     | 3     | 6     | 7     | 12    |
|    |        | W/A-Z                 | 0,90  | 0,05  | -0,66 | 0,74  | 1,29  | 1,53  | 1,71  |
|    |        | H/A-Z                 | -0,62 | -0,32 | -1,47 | 0,24  | -0,19 | -0,33 | 0,75  |
|    |        | BMI/A-Z               | -     | 0,29  | 0,24  | 0,82  | 1,86  | 2,29  | 1,78  |
| 7  | Female | HC/A-Z                | 1,65  | -0,44 | 1,05  | 0,92  | 0,77  | 0,47  | 1,08  |
|    |        | <i>AE, in months,</i> | -     | 10    | 12    | 13    | 25    | 27    | 30    |
|    |        | W/A-Z                 | 0,68  | -0,43 | -0,41 | -0,38 | 0,81  | -0,34 | -0,8  |
|    |        | H/A-Z                 | 0,24  | -0,73 | -0,19 | -0,67 | -0,59 | 0,12  | -0,42 |
|    |        | BMI/A-Z               | -     | -0,04 | -0,44 | 0,00  | 1,62  | -0,68 | -0,86 |
| 8  | Female | HC/A-Z                | 0,62  | 0,22  | 0,36  | 0,31  | 0,26  | 0,37  | 0,17  |
|    |        | <i>AE, in months,</i> | -     | 1     | 3     | 4     | 6     | 9     | 11    |
|    |        | W/A-Z                 | -0,22 | -0,21 | -1,22 | 0,14  | 0,54  | 0,88  | 0,65  |
|    |        | H/A-Z                 | -1,35 | -0,41 | -1,66 | -1,31 | -1,70 | -0,16 | -1,09 |
|    |        | BMI/A-Z               | -     | 0,00  | -0,36 | 1,21  | 2,03  | 1,29  | 1,71  |
| 9  | Male   | HC/A-Z                | -0,78 | -0,27 | -1,27 | 2,08  | 1,81  | 1,49  | 0,97  |
|    |        | <i>AE, in months,</i> | -     | 3     | 5     | 10    | -     | -     | -     |
|    |        | W/A-Z                 | 1,34  | 1,84  | 1,74  | 1,75  | -     | -     | -     |
|    |        | H/A-Z                 | 1,13  | 0,26  | 0,41  | 0,65  | -     | -     | -     |
| 10 | Female | BMI/A-Z               | -     | 2,31  | 2,03  | 1,90  | -     | -     | -     |

|    |        |                       |       |       |       |       |       |       |       |
|----|--------|-----------------------|-------|-------|-------|-------|-------|-------|-------|
|    |        | HC/A-Z                | 1,94  | 0,76  | 0,36  | 0,85  | -     | -     | -     |
|    |        | <i>AE, in months,</i> | -     | 1     | 2     | 6     | 11    | 22    | 40    |
|    |        | W/A-Z                 | 0,01  | -0,61 | -0,98 | -1,58 | -1,54 | -1,89 | -1,37 |
|    |        | H/A-Z                 | -1,60 | 0,32  | -0,55 | -1,37 | -1,39 | -1,92 | -1,72 |
|    |        | BMI/A-Z               | -     | -1,13 | -0,94 | -1,07 | -1,02 | -0,96 | -0,41 |
| 11 | Female | HC/A-Z                | -0,78 | -1,62 | -0,62 | -0,28 | -0,21 | 0,03  | -0,59 |
|    |        | <i>AE, in months,</i> | -     | 2     | 5     | 9     | 10    | 11    | 26    |
|    |        | W/A-Z                 | -1,17 | -0,55 | -0,6  | -0,66 | -0,8  | -1,09 | -1,56 |
|    |        | H/A-Z                 | -2,68 | -2,23 | -2,79 | -1,37 | -1,63 | -1,65 | -2,91 |
|    |        | BMI/A-Z               | -     | 1     | 1,41  | 0,18  | 0,19  | -0,18 | 0,48  |
| 12 | Female | HC/A-Z                | -3,50 | -5,33 | -5,07 | -5,99 | -6,22 | -6,47 | -6,76 |
|    |        | <i>AE, in months,</i> | -     | 11    | 13    | 18    | 21    | -     | -     |
|    |        | W/A-Z                 | -0,12 | -0,39 | -0,41 | -0,07 | 0,03  | -     | -     |
|    |        | H/A-Z                 | -0,41 | -0,75 | -0,99 | -0,82 | -1,13 | -     | -     |
|    |        | BMI/A-Z               | -     | 0,05  | 0,22  | 0,57  | 0,98  | -     | -     |
| 13 | Female | HC/A-Z                | 0,52  | -0,46 | -0,31 | -0,20 | 0,21  | -     | -     |
|    |        | <i>AE, in months,</i> | -     | 7     | 9     | 11    | 19    | 24    | -     |
|    |        | W/A-Z                 | 2,64  | 0,29  | 0,15  | 0,06  | 0,23  | 0,38  | -     |
|    |        | H/A-Z                 | 1,80  | -0,55 | -0,18 | -0,08 | 0,15  | -0,72 | -     |
|    |        | BMI/A-Z               | -     | 0,81  | 0,32  | 0,13  | 0,18  | 1,13  | -     |
| 14 | Female | HC/A-Z                | 0,49  | -0,25 | -0,45 | 0,42  | 0,44  | 0,6   | -     |
|    |        | <i>AE, in months,</i> | -     | 1     | 3     | 6     | 8     | 13    | 19    |
|    |        | W/A-Z                 | 0,98  | 0,87  | 0,94  | 1,17  | 1,34  | 1,20  | 0,90  |
|    |        | H/A-Z                 | -0,14 | 0,20  | 0,34  | 0,34  | -0,12 | 0,96  | 0,44  |
|    |        | BMI/A-Z               | -     | 1,06  | 1,02  | 1,30  | 1,89  | 0,92  | 0,90  |
| 15 | Female | HC/A-Z                | 2,68  | 1,24  | 1,69  | 2,37  | 2,61  | 1,66  | 1,77  |

|    |        |                |       |       |       |       |       |       |       |
|----|--------|----------------|-------|-------|-------|-------|-------|-------|-------|
| 16 | Female | AE, in months, | -     | 7     | 24    | -     | -     | -     | -     |
|    |        | W/A-Z          | 1,43  | 0,51  | 0,15  | -     | -     | -     | -     |
|    |        | H/A-Z          | -0,17 | 0,96  | -1,09 | -     | -     | -     | -     |
|    |        | BMI/A-Z        | -     | -0,05 | 1,13  | -     | -     | -     | -     |
|    |        | HC/A-Z         | 1,92  | 0,75  | 0,57  | -     | -     | -     | -     |
| 17 | Female | AE, in months, | -     | 10    | -     | -     | -     | -     | -     |
|    |        | W/A-Z          | 1,01  | 0,72  | -     | -     | -     | -     | -     |
|    |        | H/A-Z          | 0,49  | 1,42  | -     | -     | -     | -     | -     |
|    |        | BMI/A-Z        | -     | -0,10 | -     | -     | -     | -     | -     |
|    |        | HC/A-Z         | 0,59  | 0,37  | -     | -     | -     | -     | -     |
| 18 | Female | AE, in months, | -     | 2     | 6     | 8     | -     | -     | -     |
|    |        | W/A-Z          | -0,04 | -1,44 | -1,61 | -1,57 | -     | -     | -     |
|    |        | H/A-Z          | -0,41 | 0,03  | -3,76 | -1,56 | -     | -     | -     |
|    |        | BMI/A-Z        | -     | -2,00 | 0,91  | -0,90 | -     | -     | -     |
|    |        | HC/A-Z         | -0,78 | -0,55 | -0,57 | -0,23 | -     | -     | -     |
| 19 | Male   | AE, in months, | -     | 0     | 1     | 3     | 6     | 8     | 9     |
|    |        | W/A-Z          | 0,97  | -0,05 | -1,83 | 0,33  | 0,34  | 0,54  | 0,90  |
|    |        | H/A-Z          | -0,17 | 1,07  | -0,28 | 1,22  | 0,98  | 0,97  | 0,72  |
|    |        | BMI/A-Z        | -     | -0,85 | -2,45 | -0,49 | -0,28 | 0,00  | 0,66  |
|    |        | HC/A-Z         | 0,08  | -0,64 | -0,61 | -1,21 | -1,51 | -0,90 | -0,10 |
| 20 | Male   | AE, in months, | -     | 11    | -     | -     | -     | -     | -     |
|    |        | W/A-Z          | 0,02  | 1,32  | -     | -     | -     | -     | -     |
|    |        | H/A-Z          | -0,17 | 1,65  | -     | -     | -     | -     | -     |
|    |        | BMI/A-Z        | -     | 0,58  | -     | -     | -     | -     | -     |
|    |        | HC/A-Z         | 0,08  | 1,87  | -     | -     | -     | -     | -     |
|    |        | AE, in months, | -     | 3     | 6     | 10    | 12    | 14    | 18    |

|    |        |                       |       |       |       |       |       |       |       |
|----|--------|-----------------------|-------|-------|-------|-------|-------|-------|-------|
|    |        | W/A-Z                 | -0,90 | -2,16 | 0,00  | -0,42 | -0,89 | -0,57 | -0,46 |
|    |        | H/A-Z                 | -3,24 | -2,85 | -1,70 | -3,60 | -2,12 | -2,38 | -2,77 |
|    |        | BMI/A-Z               | -     | -0,70 | 1,34  | 2,33  | 0,51  | 1,18  | 1,74  |
| 21 | Male   | HC/A-Z                | 0,44  | -1,44 | 1,36  | 0,90  | 1,34  | 1,02  | 1,19  |
|    |        | <i>AE, in months,</i> | -     | 1     | 3     | 5     | 9     | 14    | 17    |
|    |        | W/A-Z                 | 0,50  | -1,13 | 0,33  | -0,41 | -0,47 | -0,84 | -0,74 |
|    |        | H/A-Z                 | -1,18 | -3,75 | -2,04 | -3,62 | -5,86 | -2,33 | -2,53 |
|    |        | BMI/A-Z               | -     | 1,48  | 2,09  | 2,37  | 4,27  | 0,79  | 1,14  |
| 22 | Male   | HC/A-Z                | -2,70 | -3,94 | -5,32 | -5,05 | -5,62 | -5,17 | -6,26 |
|    |        | <i>AE, in months,</i> | -     | 4     | 16    | -     | -     | -     | -     |
|    |        | W/A-Z                 | 0,25  | 0,18  | -0,54 | -     | -     | -     | -     |
|    |        | H/A-Z                 | -0,05 | -1,81 | -0,83 | -     | -     | -     | -     |
|    |        | BMI/A-Z               | -     | 1,68  | -0,04 | -     | -     | -     | -     |
| 23 | Male   | HC/A-Z                | 1,24  | -0,06 | 0,62  | -     | -     | -     | -     |
|    |        | <i>AE, in months,</i> | -     | 9     | -     | -     | -     | -     | -     |
|    |        | W/A-Z                 | 2,21  | 2,69  | -     | -     | -     | -     | -     |
|    |        | H/A-Z                 | 1,01  | 1,98  | -     | -     | -     | -     | -     |
|    |        | BMI/A-Z               | -     | 2,23  | -     | -     | -     | -     | -     |
| 24 | Male   | HC/A-Z                | 2,46  | 2,24  | -     | -     | -     | -     | -     |
|    |        | <i>AE, in months,</i> | -     | 3     | 6     | 15    | -     | -     | -     |
|    |        | W/A-Z                 | -1,47 | -1,96 | -1,62 | -1,34 | -     | -     | -     |
|    |        | H/A-Z                 | -2,28 | -2,7  | -1,42 | -1    | -     | -     | -     |
|    |        | BMI/A-Z               | -     | -0,49 | -1,07 | -1,05 | -     | -     | -     |
| 25 | Male   | HC/A-Z                | -2,82 | -7,13 | -6,39 | -7,55 | -     | -     | -     |
|    |        | <i>AE, in months,</i> | -     | 1     | 10    | 32    | 41    | -     | -     |
| 26 | Female | W/A-Z                 | 1,34  | 0,83  | 1,89  | 2,95  | 3,78  | -     | -     |

|       |        |                       |       |       |       |       |       |       |       |
|-------|--------|-----------------------|-------|-------|-------|-------|-------|-------|-------|
|       |        | H/A-Z                 | 0,49  | 0,79  | 1,57  | 2,15  | 2,09  | -     | -     |
|       |        | BMI/A-Z               | -     | 0,60  | 1,43  | 2,56  | 3,84  | -     | -     |
|       |        | HC/A-Z                | 0,22  | 0,49  | 1,98  | -     | -     | -     | -     |
| <hr/> |        |                       |       |       |       |       |       |       |       |
|       |        | <i>AE, in months,</i> | -     | 4     | 6     | -     | -     | -     | -     |
|       |        | W/A-Z                 | 1,63  | 0,89  | 0,39  | -     | -     | -     | -     |
|       |        | H/A-Z                 | 2,83  | 0,16  | -0,66 | -     | -     | -     | -     |
|       |        | BMI/A-Z               | -     | 1,06  | 1,02  | -     | -     | -     | -     |
| 27    | Male   | HC/A-Z                | -0,70 | 0,84  | 0,30  | -     | -     | -     | -     |
| <hr/> |        |                       |       |       |       |       |       |       |       |
|       |        | <i>AE, in months,</i> | -     | 1     | 3     | 4     | 6     | 7     | 27    |
|       |        | W/A-Z                 | -0,86 | -1,07 | -0,85 | -0,87 | -0,29 | -0,55 | -0,07 |
|       |        | H/A-Z                 | -1,74 | -1,37 | -0,73 | -0,86 | -1,35 | -1,08 | -0,43 |
|       |        | BMI/A-Z               | -     | -0,51 | -0,61 | -0,51 | 0,68  | 0,12  | 0,26  |
| 28    | Male   | HC/A-Z                | -2,00 | -1,92 | -1,73 | -0,65 | -1,36 | -0,05 | -0,46 |
| <hr/> |        |                       |       |       |       |       |       |       |       |
|       |        | <i>AE, in months,</i> | -     | 4     | 7     | 8     | 10    | 14    | 19    |
|       |        | W/A-Z                 | 0,91  | -0,15 | -0,11 | 0,38  | 0,75  | 0,92  | 0,87  |
|       |        | H/A-Z                 | 0,49  | 0,53  | -0,89 | -0,65 | -0,34 | 0,15  | -0,14 |
|       |        | BMI/A-Z               | -     | -0,61 | 0,53  | 1,01  | 1,28  | 1,15  | 1,32  |
| 29    | Female | HC/A-Z                | 1,11  | -2,30 | 0,05  | 0,27  | 0,86  | 0,68  | 0,70  |
| <hr/> |        |                       |       |       |       |       |       |       |       |
|       |        | <i>AE, in months,</i> | -     | 4     | 7     | 12    | 14    | 17    | 29    |
|       |        | W/A-Z                 | 0,38  | 1,41  | 1,13  | 1,46  | 1,59  | 1,57  | 1,28  |
|       |        | H/A-Z                 | -1,60 | 0,81  | -0,19 | -0,44 | -0,06 | -0,21 | 1,37  |
|       |        | BMI/A-Z               | -     | 1,30  | 1,64  | 2,31  | 2,23  | 2,34  | 0,66  |
| 30    | Female | HC/A-Z                | 0,52  | 1,06  | 0,09  | 0,42  | 0,67  | 0,56  | 1,16  |
| <hr/> |        |                       |       |       |       |       |       |       |       |
|       |        | <i>AE, in months,</i> | -     | 6     | -     | -     | -     | -     | -     |
|       |        | W/A-Z                 | 0,48  | 1,84  | -     | -     | -     | -     | -     |
| 31    | Male   | H/A-Z                 | 0,12  | -0,62 | -     | -     | -     | -     | -     |

|       |        |                       |       |       |       |       |       |       |       |
|-------|--------|-----------------------|-------|-------|-------|-------|-------|-------|-------|
|       |        | BMI/A-Z               | -     | 2,84  | -     | -     | -     | -     | -     |
|       |        | HC/A-Z                | 1,72  | 1,17  | -     | -     | -     | -     | -     |
| <hr/> |        |                       |       |       |       |       |       |       |       |
|       |        | <i>AE, in months,</i> | -     | 2     | 4     | 6     | 12    | 15    | 18    |
|       |        | W/A-Z                 | -1,65 | -0,66 | -0,06 | -0,10 | 0,18  | 0,02  | 0,46  |
|       |        | H/A-Z                 | -3,86 | -1,74 | -0,30 | -0,86 | -2,87 | -1,59 | -1,14 |
|       |        | BMI/A-Z               | -     | 0,44  | 0,15  | 0,52  | 2,52  | 1,31  | 1,55  |
| 32    | Female | HC/A-Z                | -1,28 | -0,40 | 0,73  | 0,54  | 1,10  | 1,65  | 1,26  |
| <hr/> |        |                       |       |       |       |       |       |       |       |
|       |        | <i>AE, in months,</i> | -     | 4     | 6     | 19    | 22    | -     | -     |
|       |        | W/A-Z                 | 1,11  | -0,51 | -0,86 | -0,30 | -0,21 | -     | -     |
|       |        | H/A-Z                 | 0,43  | 0,20  | -0,22 | 0,05  | -0,89 | -     | -     |
|       |        | BMI/A-Z               | -     | -0,84 | -0,98 | -0,45 | 0,50  | -     | -     |
| 33    | Male   | HC/A-Z                | 2,16  | 0,68  | 0,89  | 1,02  | 1,42  | -     | -     |
| <hr/> |        |                       |       |       |       |       |       |       |       |
|       |        | <i>AE, in months,</i> | -     | 6     | 8     | 14    | 19    | -     | -     |
|       |        | W/A-Z                 | -0,16 | -0,10 | 0,06  | -0,07 | -0,21 | -     | -     |
|       |        | H/A-Z                 | -0,77 | -1,18 | -1,09 | -2,36 | -1,79 | -     | -     |
|       |        | BMI/A-Z               | -     | 0,79  | 0,95  | 1,81  | 1,25  | -     | -     |
| 34    | Male   | HC/A-Z                | 1,11  | 0,45  | 0,56  | 0,27  | 0,63  | -     | -     |
| <hr/> |        |                       |       |       |       |       |       |       |       |
|       |        | <i>AE, in months,</i> | -     | 8     | 17    | 31    | -     | -     | -     |
|       |        | W/A-Z                 | -0,81 | -0,63 | -1,01 | -1,54 | -     | -     | -     |
|       |        | H/A-Z                 | 0,04  | 0,13  | -0,34 | -0,51 | -     | -     | -     |
|       |        | BMI/A-Z               | -     | -0,95 | -1,15 | -1,93 | -     | -     | -     |
| 35    | Male   | HC/A-Z                | -1,15 | -1,4  | -1,74 | -1,98 | -     | -     | -     |
| <hr/> |        |                       |       |       |       |       |       |       |       |
|       |        | <i>AE, in months,</i> | -     | 7     | -     | -     | -     | -     | -     |
|       |        | W/A-Z                 | -1,49 | 1,52  | -     | -     | -     | -     | -     |
|       |        | H/A-Z                 | -1,38 | -0,12 | -     | -     | -     | -     | -     |
| 36    | Female | BMI/A-Z               | -     | 2,12  | -     | -     | -     | -     | -     |

|    |        |                       |       |       |       |       |       |       |       |
|----|--------|-----------------------|-------|-------|-------|-------|-------|-------|-------|
|    |        | HC/A-Z                | -1,63 | -0,01 | -     | -     | -     | -     | -     |
|    |        | <i>AE, in months,</i> | -     | 5     | 7     | 12    | 15    | 18    | 21    |
|    |        | W/A-Z                 | -2,21 | 0,60  | 0,91  | 0,72  | 0,92  | 0,59  | 1,07  |
|    |        | H/A-Z                 | -1,76 | -1,34 | -0,29 | 0,15  | -0,21 | -0,61 | -0,95 |
|    |        | BMI/A-Z               | -     | 1,83  | 1,44  | 0,87  | 1,43  | 1,30  | 2,25  |
| 37 | Female | HC/A-Z                | -0,91 | 0,06  | 0,77  | 0,79  | 0,24  | 0,90  | 1,12  |
|    |        | <i>AE, in months,</i> | -     | 3     | 4     | 6     | 10    | 12    | -     |
|    |        | W/A-Z                 | -0,12 | 0,52  | 0,90  | 1,37  | 1,23  | 1,04  | -     |
|    |        | H/A-Z                 | 0,94  | -0,01 | 0,16  | 0,89  | 1,29  | 0,52  | -     |
|    |        | BMI/A-Z               | -     | 0,71  | 1,07  | 1,12  | 0,68  | 1,00  | -     |
| 38 | Male   | HC/A-Z                | 0,26  | 1,88  | 1,26  | 1,44  | 0,30  | 1,02  | -     |
|    |        | <i>AE, in months,</i> | -     | 5     | 8     | 12    | 18    | -     | -     |
|    |        | W/A-Z                 | 0,17  | 0,17  | -0,21 | -0,39 | 0,35  | -     | -     |
|    |        | H/A-Z                 | 2,58  | 0,28  | 0,01  | -0,52 | -0,16 | -     | -     |
|    |        | BMI/A-Z               | -     | 0,01  | -0,32 | -0,14 | 0,62  | -     | -     |
| 39 | Female | HC/A-Z                | 0,08  | 0,30  | 0,17  | 0,65  | 0,74  | -     | -     |
|    |        | <i>AE, in months,</i> | -     | 3     | 6     | 9     | 12    | 18    | 24    |
|    |        | W/A-Z                 | -2,44 | -2,07 | -1,61 | -1,88 | -1,70 | -2,03 | -2,41 |
|    |        | H/A-Z                 | -2,14 | -1,83 | -1,26 | -0,75 | -1,19 | -1,15 | -1,41 |
|    |        | BMI/A-Z               | -     | -1,39 | -1,19 | -2,01 | -1,41 | -1,91 | -2,25 |
| 40 | Female | HC/A-Z                | -1,62 | -1,25 | -1,12 | -0,61 | -1,58 | -1,70 | -1,80 |
|    |        | <i>AE, in months,</i> | -     | 11    | -     | -     | -     | -     | -     |
|    |        | W/A-Z                 | -1,07 | -2,07 | -     | -     | -     | -     | -     |
|    |        | H/A-Z                 | -1,60 | -1,77 | -     | -     | -     | -     | -     |
|    |        | BMI/A-Z               | -     | -1,41 | -     | -     | -     | -     | -     |
| 41 | Female | HC/A-Z                | -0,37 | -0,48 | -     | -     | -     | -     | -     |

|    |        |                |       |       |       |       |       |    |    |
|----|--------|----------------|-------|-------|-------|-------|-------|----|----|
| 42 | Female | AE, in months, | -     | 11    | 17    | -     | -     | -  | -  |
|    |        | W/A-Z          | 1,13  | -0,46 | -0,43 | -     | -     | -  | -  |
|    |        | H/A-Z          | -0,41 | -0,51 | -0,05 | -     | -     | -  | -  |
|    |        | BMI/A-Z        | -     | -0,24 | -0,58 | -     | -     | -  | -  |
|    |        | HC/A-Z         | 0,52  | -0,31 | -0,04 | -     | -     | -  | -  |
| 43 | Female | AE, in months, | -     | 13    | 16    | -     | -     | -  | -  |
|    |        | W/A-Z          | -0,18 | 1,82  | 1,66  | -     | -     | -  | -  |
|    |        | H/A-Z          | 0,35  | -2,12 | 0,01  | -     | -     | -  | -  |
|    |        | BMI/A-Z        | -     | 4,20  | 2,27  | -     | -     | -  | -  |
|    |        | HC/A-Z         | 0,09  | 2,00  | 1,87  | -     | -     | -  | -  |
| 44 | Male   | AE, in months, | -     | 12    | -     | -     | -     | -  | -  |
|    |        | W/A-Z          | -1,11 | -0,84 | -     | -     | -     | -  | -  |
|    |        | H/A-Z          | -2,45 | -3,51 | -     | -     | -     | -  | -  |
|    |        | BMI/A-Z        | -     | 1,86  | -     | -     | -     | -  | -  |
|    |        | HC/A-Z         | -1,15 | -0,99 | -     | -     | -     | -  | -  |
| 45 | Female | AE, in months, | -     | 12    | 15    | 16    | 17    | -  | -  |
|    |        | W/A-Z          | 1,03  | 1,78  | 2,08  | 2,73  | 2,33  | -  | -  |
|    |        | H/A-Z          | -     | -0,84 | 0,33  | 0,50  | 1,27  | -  | -  |
|    |        | BMI/A-Z        | -     | 3,05  | 2,61  | 3,40  | 2,28  | -  | -  |
|    |        | HC/A-Z         | -0,71 | -0,77 | 0,24  | 0,10  | -0,46 | -  | -  |
| 46 | Male   | AE, in months, | -     | 10    | 13    | 23    | -     | -  | -  |
|    |        | W/A-Z          | 0,19  | -0,16 | -0,30 | -1,19 | -     | -  | -  |
|    |        | H/A-Z          | 1,42  | -3,33 | 0,01  | -1,53 | -     | -  | -  |
|    |        | BMI/A-Z        | -     | 2,43  | -0,42 | -0,32 | -     | -  | -  |
|    |        | HC/A-Z         | 1,29  | 0,26  | 0,50  | 0,66  | -     | -  | -  |
|    |        | AE, in months, | -     | 2     | 4     | 5     | 7     | 13 | 32 |

|                       |        |         |       |       |       |       |       |       |       |
|-----------------------|--------|---------|-------|-------|-------|-------|-------|-------|-------|
|                       |        | W/A-Z   | 0,12  | 0,07  | 0,13  | -0,02 | -0,03 | -0,17 | -0,33 |
|                       |        | H/A-Z   | -0,71 | 0,16  | 0,18  | -0,17 | -0,10 | 0,13  | -0,37 |
|                       |        | BMI/A-Z | -     | -0,04 | 0,02  | 0,09  | 0,02  | -0,36 | -0,20 |
| 47                    | Female | HC/A-Z  | -0,83 | -0,01 | -0,21 | -0,81 | -0,61 | -0,20 | -0,47 |
| <i>AE, in months,</i> |        |         | -     | 15    | 21    | 23    | -     | -     | -     |
|                       |        | W/A-Z   | 1,43  | -0,59 | -0,73 | -1,29 | -     | -     | -     |
|                       |        | H/A-Z   | -0,14 | -1,40 | -0,32 | -1,03 | -     | -     | -     |
|                       |        | BMI/A-Z | -     | 0,32  | -0,79 | -0,96 | -     | -     | -     |
| 48                    | Female | HC/A-Z  | 1,94  | 0,52  | 0,15  | 0,60  | -     | -     | -     |
| <i>AE, in months,</i> |        |         | -     | 12    | -     | -     | -     | -     | -     |
|                       |        | W/A-Z   | -0,55 | -1,19 | -     | -     | -     | -     | -     |
|                       |        | H/A-Z   | -2,28 | -1,2  | -     | -     | -     | -     | -     |
|                       |        | BMI/A-Z | -     | -0,65 | -     | -     | -     | -     | -     |
| 49                    | Male   | HC/A-Z  | 0,41  | -0,82 | -     | -     | -     | -     | -     |
| <i>AE, in months,</i> |        |         | -     | 12    | -     | -     | -     | -     | -     |
|                       |        | W/A-Z   | 0,70  | 1,74  | -     | -     | -     | -     | -     |
|                       |        | H/A-Z   | -0,10 | 0,14  | -     | -     | -     | -     | -     |
|                       |        | BMI/A-Z | -     | 2,23  | -     | -     | -     | -     | -     |
| 50                    | Male   | HC/A-Z  | 1,43  | 1,31  | -     | -     | -     | -     | -     |
| <i>AE, in months,</i> |        |         | -     | 12    | -     | -     | -     | -     | -     |
|                       |        | W/A-Z   | 0,04  | 1,62  | -     | -     | -     | -     | -     |
|                       |        | H/A-Z   | 0,43  | -0,61 | -     | -     | -     | -     | -     |
|                       |        | BMI/A-Z | -     | 2,65  | -     | -     | -     | -     | -     |
| 51                    | Male   | HC/A-Z  | -0,78 | -0,58 | -     | -     | -     | -     | -     |
| <i>AE, in months,</i> |        |         | -     | 13    | 22    | -     | -     | -     | -     |
| 52                    | Male   | W/A-Z   | -0,85 | -0,76 | -1,01 | -     | -     | -     | -     |

|       |        |                       |       |       |       |       |       |       |       |
|-------|--------|-----------------------|-------|-------|-------|-------|-------|-------|-------|
|       |        | H/A-Z                 | -0,92 | -2,96 | -2,36 | -     | -     | -     | -     |
|       |        | BMI/A-Z               | -     | 1,40  | 0,73  | -     | -     | -     | -     |
|       |        | HC/A-Z                | 0,44  | 0,07  | 0,39  | -     | -     | -     | -     |
| <hr/> |        |                       |       |       |       |       |       |       |       |
|       |        | <i>AE, in months,</i> | -     | 10    | 13    | 16    | 19    | 22    | -     |
|       |        | W/A-Z                 | 0,39  | -1,72 | -2,07 | -2,61 | -1,99 | -1,73 | -     |
|       |        | H/A-Z                 | -     | -2,66 | -2,22 | -1,86 | -2,06 | -1,61 | -     |
|       |        | BMI/A-Z               | -     | -0,18 | -1,02 | -2,08 | -1,02 | -1,04 | -     |
| 53    | Female | HC/A-Z                | -     | -1,65 | -1,4  | -1,71 | -1,38 | -1,46 | -     |
| <hr/> |        |                       |       |       |       |       |       |       |       |
|       |        | <i>AE, in months,</i> | -     | 7     | 9     | 11    | 14    | 25    | 37    |
|       |        | W/A-Z                 | 1,41  | 0,34  | 0,43  | 0,59  | 0,43  | 0,63  | 0,24  |
|       |        | H/A-Z                 | -0,14 | 1,11  | 0,29  | 1,02  | 0,82  | 0,71  | -0,03 |
|       |        | BMI/A-Z               | -     | -0,38 | 0,35  | 0,02  | -0,06 | 0,25  | 0,35  |
| 54    | Female | HC/A-Z                | 1,11  | -0,67 | 0,61  | 1,66  | 1,02  | -     | 1,18  |
| <hr/> |        |                       |       |       |       |       |       |       |       |
|       |        | <i>AE, in months,</i> | -     | 20    | 30    | -     | -     | -     | -     |
|       |        | W/A-Z                 | 0,05  | -0,86 | -1,14 | -     | -     | -     | -     |
|       |        | H/A-Z                 | -1,35 | -1,66 | -1,55 | -     | -     | -     | -     |
|       |        | BMI/A-Z               | -     | 0,25  | -0,24 | -     | -     | -     | -     |
| 55    | Male   | HC/A-Z                | -0,78 | -0,89 | -0,91 | -     | -     | -     | -     |
| <hr/> |        |                       |       |       |       |       |       |       |       |
|       |        | <i>AE, in months,</i> | -     | 19    | 25    | -     | -     | -     | -     |
|       |        | W/A-Z                 | 0,76  | 0,09  | 0,89  | -     | -     | -     | -     |
|       |        | H/A-Z                 | 0,43  | -0,29 | 0,02  | -     | -     | -     | -     |
|       |        | BMI/A-Z               | -     | 0,40  | 1,24  | -     | -     | -     | -     |
| 56    | Male   | HC/A-Z                | 1,33  | -0,01 | 0,48  | -     | -     | -     | -     |
| <hr/> |        |                       |       |       |       |       |       |       |       |
|       |        | <i>AE, in months,</i> | -     | 4     | 5     | 7     | 8     | 11    | 18    |
|       |        | W/A-Z                 | 0,06  | 0,17  | 0,32  | 1,28  | 0,52  | 0,39  | 0,73  |
| 57    | Female | H/A-Z                 | -1,21 | -0,67 | 1,10  | 1,06  | 0,70  | -0,20 | 0,82  |

|    |        |                       |       |       |       |       |       |       |       |
|----|--------|-----------------------|-------|-------|-------|-------|-------|-------|-------|
|    |        | BMI/A-Z               | -     | 0,73  | -0,40 | 0,92  | 0,17  | 0,68  | 0,36  |
|    |        | HC/A-Z                | 2,00  | -0,98 | -2,85 | -1,84 | -2,30 | -0,94 | -0,64 |
|    |        | <i>AE, in months,</i> | -     | 12    | -     | -     | -     | -     | -     |
|    |        | W/A-Z                 | -1,01 | 0,17  | -     | -     | -     | -     | -     |
|    |        | H/A-Z                 | -0,41 | -0,49 | -     | -     | -     | -     | -     |
|    |        | BMI/A-Z               | -     | 0,61  | -     | -     | -     | -     | -     |
| 58 | Female | HC/A-Z                | -1,62 | -0,38 | -     | -     | -     | -     | -     |
|    |        | <i>AE, in months,</i> | -     | 19    | 26    | 31    | 38    | -     | -     |
|    |        | W/A-Z                 | 0,25  | -0,48 | -0,25 | 0,11  | -0,06 | -     | -     |
|    |        | H/A-Z                 | -0,57 | -1,72 | -0,89 | -1,35 | -0,66 | -     | -     |
|    |        | BMI/A-Z               | -     | 0,82  | 0,43  | 1,40  | 0,50  | -     | -     |
| 59 | Male   | HC/A-Z                | -0,27 | -0,10 | 0,22  | 0,28  | -0,09 | -     | -     |
|    |        | <i>AE, in months,</i> | -     | 9     | 11    | 14    | 18    | 20    | 37    |
|    |        | W/A-Z                 | -1,69 | -1,32 | -0,80 | -0,97 | -1,30 | -0,96 | -1,51 |
|    |        | H/A-Z                 | -1,74 | -1,51 | -1,16 | -0,83 | -0,75 | -0,98 | -1,12 |
|    |        | BMI/A-Z               | -     | -0,59 | -0,16 | -0,67 | -1,21 | -0,51 | -1,25 |
| 60 | Male   | HC/A-Z                | -2,00 | -0,11 | 0,15  | -0,45 | 0,37  | 0,90  | -     |
|    |        | <i>AE, in months,</i> | -     | 3     | 5     | 22    | 34    | 41    | --    |
|    |        | W/A-Z                 | -1,57 | -0,20 | -0,98 | -1,06 | -0,96 | -0,78 | -     |
|    |        | H/A-Z                 | -0,77 | -0,09 | -1,20 | -1,08 | -1,17 | -1,69 | -     |
|    |        | BMI/A-Z               | -     | -0,20 | -0,37 | -0,56 | -0,35 | 0,49  | -     |
| 61 | Male   | HC/A-Z                | -0,78 | 0,12  | -0,29 | 0,00  | -     | -0,25 | -     |
|    |        | <i>AE, in months,</i> | -     | 2     | 4     | 6     | 19    |       | -     |
|    |        | W/A-Z                 | 1,88  | 0,25  | 1,25  | 1,52  | 1,16  | -     | -     |
|    |        | H/A-Z                 | 0,43  | 0,56  | 0,29  | 0,90  | 1,18  | -     | -     |
| 62 | Male   | BMI/A-Z               | -     | -0,09 | 1,44  | 1,31  | 0,68  | -     | -     |

|    |        |                       |       |       |       |       |       |       |   |
|----|--------|-----------------------|-------|-------|-------|-------|-------|-------|---|
|    |        | HC/A-Z                | 1,72  | 0,56  | 0,11  | 1,21  | 0,29  | -     | - |
|    |        | <i>AE, in months,</i> | -     | 20    | 23    | 40    | -     | -     | - |
|    |        | W/A-Z                 | -0,27 | -1,50 | -1,36 | -1,97 | -     | -     | - |
|    |        | H/A-Z                 | 0,49  | -2,18 | -1,48 | -1,64 | -     | -     | - |
|    |        | BMI/A-Z               | -     | -0,18 | -0,63 | -1,36 | -     | -     | - |
| 63 | Female | HC/A-Z                | 1,94  | 0,25  | -0,05 | 0,41  | -     | -     | - |
|    |        | <i>AE, in months,</i> | -     | 1     | 11    | 35    | -     | -     | - |
|    |        | W/A-Z                 | 0,05  | -0,32 | 0,37  | 0,19  | -     | -     | - |
|    |        | H/A-Z                 | 0,32  | 0,39  | -0,04 | -0,08 | -     | -     | - |
|    |        | BMI/A-Z               | -     | -0,76 | 0,57  | 0,31  | -     | -     | - |
| 64 | Male   | HC/A-Z                | -0,63 | 2,20  | -0,60 | -1,01 | -     | -     | - |
|    |        | <i>AE, in months,</i> | -     | 5     | 6     | 8     | 11    | 15    |   |
|    |        | W/A-Z                 | -0,62 | -2,25 | -2,27 | -1,59 | -1,59 | -1,93 | - |
|    |        | H/A-Z                 | -1,48 | -3,48 | -2,31 | -2,45 | -2,81 | -3,12 | - |
|    |        | BMI/A-Z               | -     | -0,22 | -1,22 | -0,18 | 0,14  | -0,01 | - |
| 65 | Male   | HC/A-Z                | -2,77 | -6,83 | -6,02 | -5,15 | -5,1  | -5,7  | - |
|    |        | <i>AE, in months,</i> | -     | 12    | -     | -     | -     | -     | - |
|    |        | W/A-Z                 | 3,41  | 0,12  | -     | -     | -     | -     | - |
|    |        | H/A-Z                 | 1,37  | -0,27 | -     | -     | -     | -     | - |
|    |        | BMI/A-Z               | -     | 0,42  | -     | -     | -     | -     | - |
| 66 | Male   | HC/A-Z                | 2,70  | 0,29  | -     | -     | -     | -     | - |
|    |        | <i>AE, in months,</i> | -     | 21    | 26    | -     | -     | -     | - |
|    |        | W/A-Z                 | -0,62 | -0,29 | -0,86 | -     | -     | -     | - |
|    |        | H/A-Z                 | -0,41 | 1,07  | -0,17 | -     | -     | -     | - |
|    |        | BMI/A-Z               | -     | -1,37 | -1,17 | -     | -     | -     | - |
| 67 | Female | HC/A-Z                | -0,37 | 0,13  | 0,02  | -     | -     | -     | - |

|    |        |                       |       |       |       |       |       |       |       |
|----|--------|-----------------------|-------|-------|-------|-------|-------|-------|-------|
| 68 | Male   | <i>AE, in months,</i> | -     | 1     | 5     | 8     | 10    | 13    | 15    |
|    |        | W/A-Z                 | -0,52 | -1,84 | -0,47 | -0,02 | -0,01 | -0,13 | -0,06 |
|    |        | H/A-Z                 | -0,77 | -1,87 | -0,89 | 0,07  | 0,16  | 0,10  | 0,22  |
|    |        | BMI/A-Z               | -     | -1,28 | 0,07  | -0,06 | -0,12 | -0,24 | -0,25 |
|    |        | HC/A-Z                | -0,78 | -0,29 | -0,08 | 0,83  | 0,39  | 0,37  | 0,10  |
|    |        | <i>AE, in months,</i> | -     | 12    | -     | -     | -     | -     | -     |
| 69 | Male   | W/A-Z                 | 0,67  | -1,09 | -     | -     | -     | -     | -     |
|    |        | H/A-Z                 | -0,17 | -1,78 | -     | -     | -     | -     | -     |
|    |        | BMI/A-Z               | -     | 0,04  | -     | -     | -     | -     | -     |
|    |        | HC/A-Z                | 2,46  | 2,24  | -     | -     | -     | -     | -     |
|    |        | <i>AE, in months,</i> | -     | 2     | 5     | 6     | 10    | 30    | 33    |
|    |        | W/A-Z                 | 0,13  | -0,70 | -0,73 | -0,32 | -0,26 | -0,35 | -0,17 |
| 70 | Female | H/A-Z                 | 1,04  | -0,37 | 0,65  | 0,53  | 0,19  | -0,06 | -0,11 |
|    |        | BMI/A-Z               | -     | -0,69 | -1,50 | -0,85 | -0,53 | -0,53 | -0,20 |
|    |        | HC/A-Z                | 1,16  | -1,67 | -1,31 | -0,94 | 1,09  | -0,50 | -0,31 |
|    |        | <i>AE, in months,</i> | -     | 2     | 6     | 10    | 12    | 18    | 26    |
|    |        | W/A-Z                 | 1,28  | 1,56  | 2,65  | 2,68  | 2,62  | 1,77  | 1,13  |
|    |        | H/A-Z                 | 1,96  | 0,09  | 3,67  | 1,41  | 1,64  | 0,01  | 1,23  |
| 71 | Male   | BMI/A-Z               | -     | 2,05  | 0,80  | 2,43  | 2,22  | 2,38  | 0,53  |
|    |        | HC/A-Z                | 2,56  | 3,00  | 3,64  | 2,96  | 3,23  | 2,64  | 2,83  |

W/A-Z, H/A-Z, BMI/A-Z, HC/A-Z: Z-score Weight, Height, BMI (body mass index) and HC (head circumference) for Age, respectively.  
 AE: Age at evaluation, in months.
